# Supplementary material
Source: PubMed Central journal article supplement (PMC1782373)
Supplement: 7601490s2.pdf [file 7601490s2.pdf]

## Supplemental Figure 2 , Yamasaki S. et al

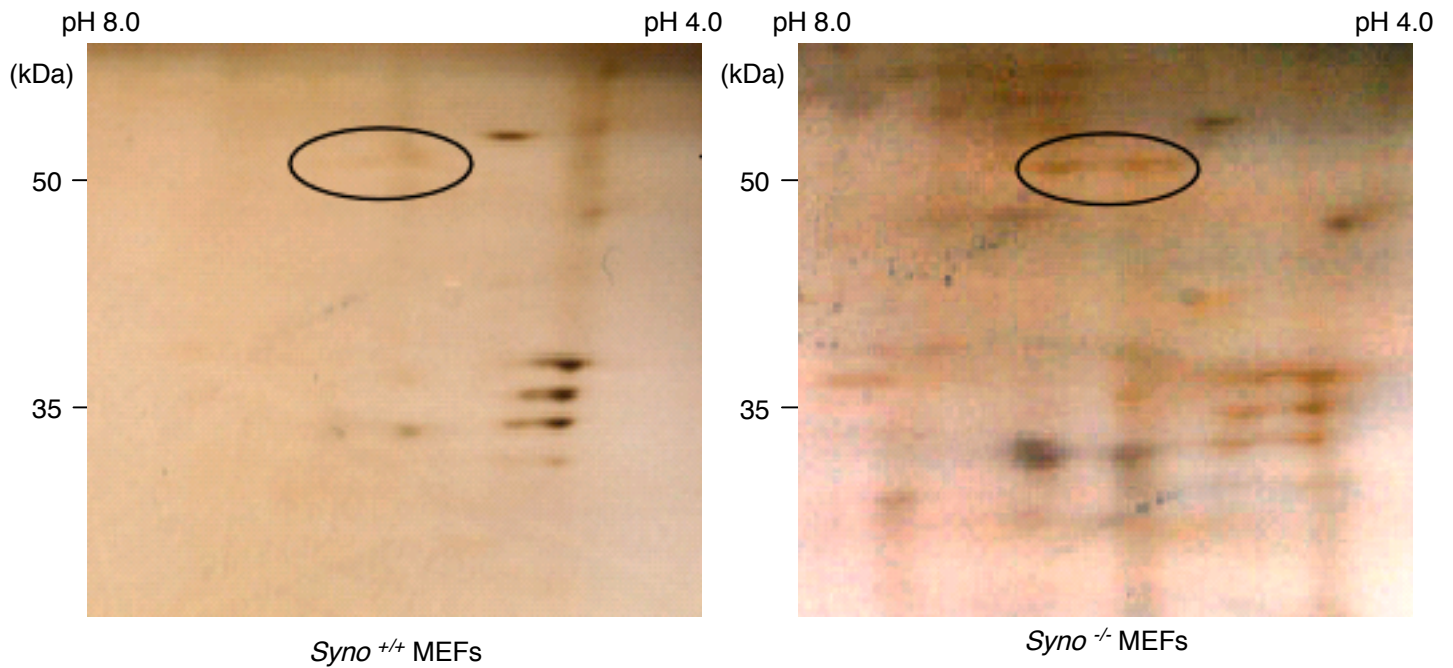

### Supplemental Figure 2. The proteome analysis of *Syno*<sup>+/+</sup> and *Syno*<sup>-/-</sup> MEFs.

After the proteins from *Syno*<sup>+/+</sup> and *Syno*<sup>-/-</sup> MEFs were separated by 2-dimensional PAGE, the gels were stained with colloidal blue dye. The spots were excised, in-gel digested with trypsin, and the resulting peptides were analyzed by TOF MS. Each spot was identified by searching peptide spectra against NCBI database. One major spot was p53 (circle).
