# Supplementary material
Source: PubMed Central journal article supplement (PMC1782373)
Supplement: 7601490s3.pdf [file 7601490s3.pdf]

## Supplemental Figure 3 , Yamasaki S. et al

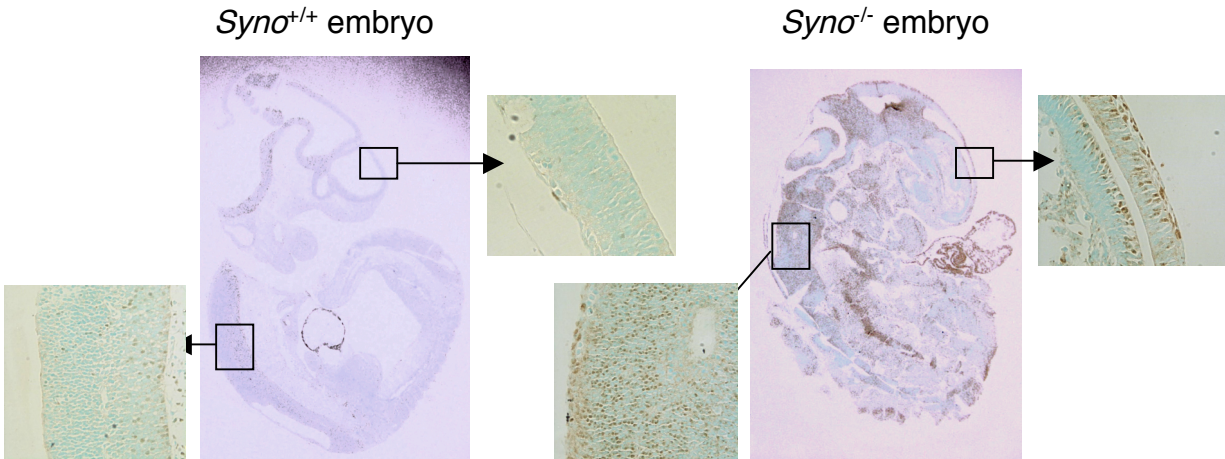

**Supplemental Figure 3. p53 was accumulated in *Syno*<sup>-/-</sup> embryos.**

Immunostaining of p53 in *Syno*<sup>-/-</sup> embryos (E10.5). Magnification (×10, ×400).
