# Supplementary material
Source: PubMed Central journal article supplement (PMC1782373)
Supplement: 7601490s4.pdf [file 7601490s4.pdf]

## Supplemental Figure 4 , Yamasaki S. et al

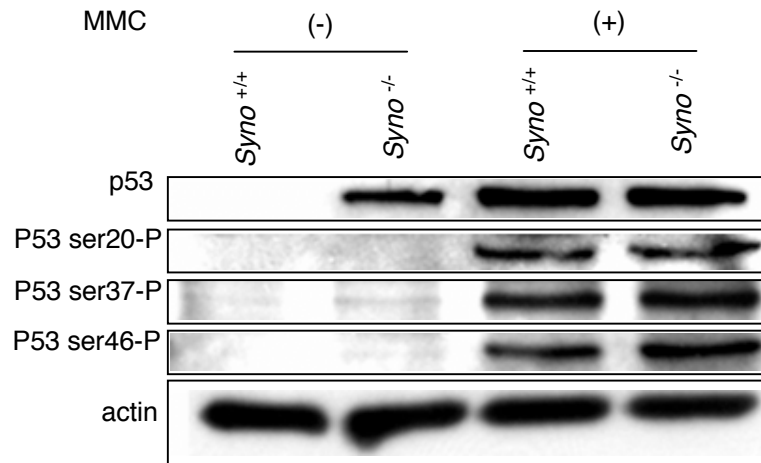

### Supplemental Figure 4. Serine residue 20, 37, 46 of p53 was not phosphorylated in *Syno*<sup>-/-</sup> MEFs.

Phosphorylation of p53 at N-terminus serine residue (ser 20, 37, 46) were examined in wild type (*Syno*<sup>+/+</sup>) or *synoviolin* knock-out MEFs (*Syno*<sup>-/-</sup>) with or without Mitomycin C (5 $\mu$ M) treatment 6 hours. All serine residue, ser20, ser37, ser46 were phosphorylated in both *Syno*<sup>+/+</sup> and *Syno*<sup>-/-</sup> MEFs by the treatment with Mitomycin C. None of the phosphorylation of p53 serine residue that we checked (ser20, ser37, ser46) were observed in no treated *Syno*<sup>-/-</sup>, even though the protein expression of p53 was clearly up-regulated.
