# Supplementary material
Source: PubMed Central journal article supplement (PMC1782373)
Supplement: 7601490s5.pdf [file 7601490s5.pdf]

## Supplemental Figure 5 , Yamasaki S. et al

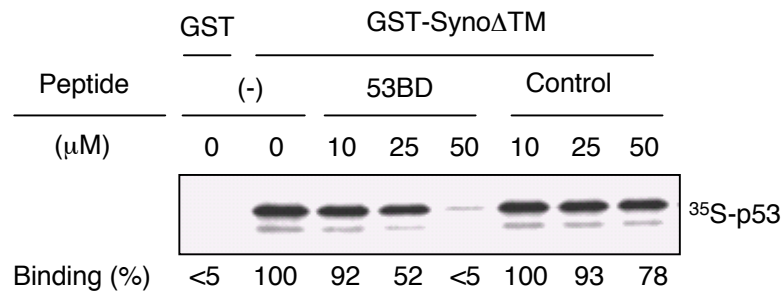

### Supplemental Figure 5. 53BD peptide inhibits Synoviolin-p53 interaction.

*In vitro* translated  $^{35}\text{S}$ -labeled p53 was pre-incubated with indicated concentrations of 53BD or control peptide, representing amino acids 322-332 of Synoviolin, followed by incubation with GST-Synoviolin  $\Delta$ TM. Displayed data are the results of autoradiography of bound  $^{35}\text{S}$ -p53. The binding ratios were quantified by NHI Image software and shown as percentage values (100% = GST-Syno $\Delta$ TM with no peptide).
