# Supplementary material
Source: PubMed Central journal article supplement (PMC1782373)
Supplement: 7601490s6.pdf [file 7601490s6.pdf]

## Supplemental Figure 6 , Yamasaki S. et al

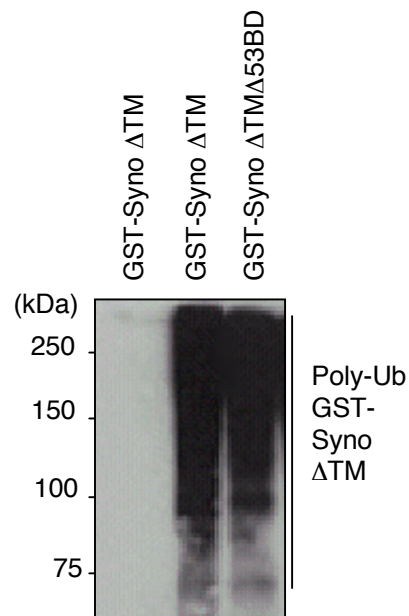

### **Supplemental Figure 6. Deletion of Syno53BD does not influence auto-ubiquitination activity of Synoviolin.**

Auto-ubiquitinated Synoviolin was detected by immunoblotting using anti-HA antibody.
