# Supplementary material
Source: PubMed Central journal article supplement (PMC1782373)
Supplement: 7601490s7.pdf [file 7601490s7.pdf]

## Supplemental Figure 7 , Yamasaki S. et al

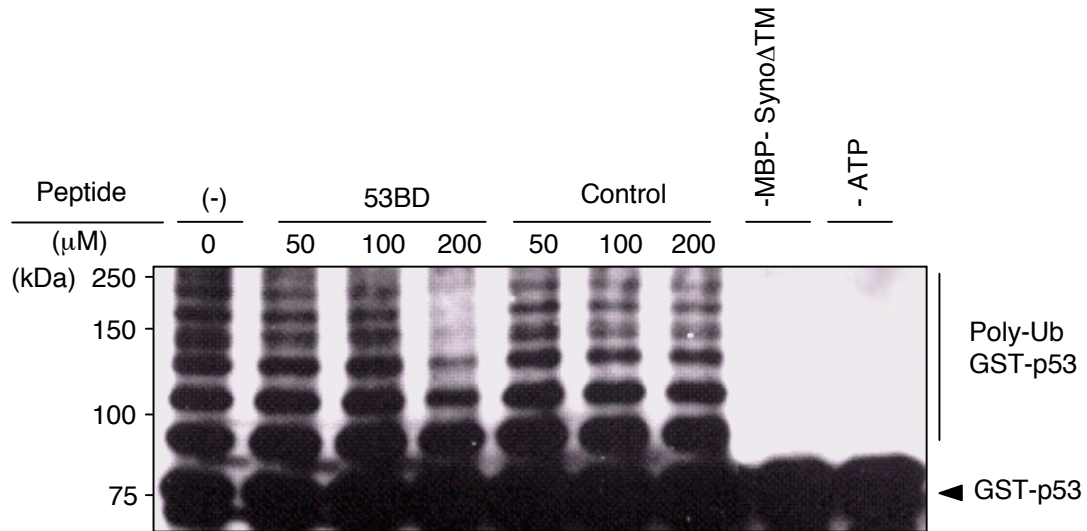

### Supplemental Figure 7. 53BD peptide inhibits ubiquitination of p53 by Synoviolin.

The ubiquitination reaction mixtures lacking MBP-SynoΔTM or ATP were preincubated on ice for 30 min. Ubiquitination assays of p53 were started by addition of these two components followed by incubation at 37°C for 1 h. Polyubiquitinated p53 was detected using anti-p53 antibody.
