# Supplementary material
Source: PubMed Central journal article supplement (PMC1782373)
Supplement: 7601490s8.pdf [file 7601490s8.pdf]

## Supplemental Figure 8 , Yamasaki S. et al

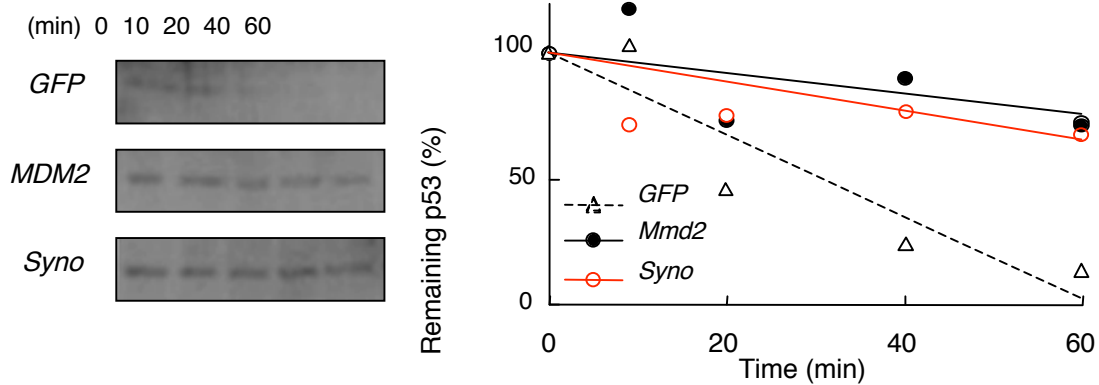

### Supplemental Figure 8. Ablation of Synoviolin remarkably prolongs the half-life of p53 in RKO cells.

RKO cells were transfected with siRNA for 48h then treated with 10  $\mu\text{g/ml}$  CHX for indicated times. The remaining p53 expressions were normalized to  $\beta$  actin expression and plotted against time. The half-life of p53 in *Syno* siRNA treated cells were prolonged as well as in *MDM2* siRNA treated cells (*GFP* siRNA: 30min, *MDM2* siRNA: 122 min, *Syno* siRNA: 86min).
