# Supplementary material
Source: PubMed Central journal article supplement (PMC1782373)
Supplement: 7601490s9.pdf [file 7601490s9.pdf]

Supplemental Table 1, Yamasaki S, et al

Table 1. Suppression of Dmp53 induced bubbled wing phenotype by dsyno expression

Cross I : e16E-Gal4/CyO ; UAS-dsyno/TM6B X UAS-Dmp53/UAS-Dmp53 ; +/+

| Genotype of progenies             | Number of progenies | Bubbled wing (%) |
|-----------------------------------|---------------------|------------------|
| e16E-Gal4/UAS-Dmp53 ; UAS-dsyno/+ | 14                  | 0%               |
| e16-Gal4/UAS-Dmp53 ; TM6B/+       | 28                  | 100%             |
| CyO/UAS-Dmp53 ; UAS-dsyno/+       | 36                  | 0%               |
| CyO/UAS-Dmp53 ; TM6B/+            | 24                  | 0%               |

Data are mean of two independent experiments

Cross II : e16E-Gal4/CyO ; +/+ X UAS-Dmp53/UAS-Dmp53 ; +/+

| Genotype of progenies    | Number of progenies | Bubbled wing (%) |
|--------------------------|---------------------|------------------|
| e16-Gal4/UAS-Dmp53 ; +/+ | > 50                | 100%             |
| CyO/UAS-Dmp53 ; +/+      | > 50                | 0%               |
